# Supplementary figures and images for: A Model-Driven Co-Design Framework for Fusing Control and Scheduling Viewpoints
Source: MDPI journal article supplement (doi:10.3390/s18020628), 2018-02-20

# CPAL controller model of cruise control ECU

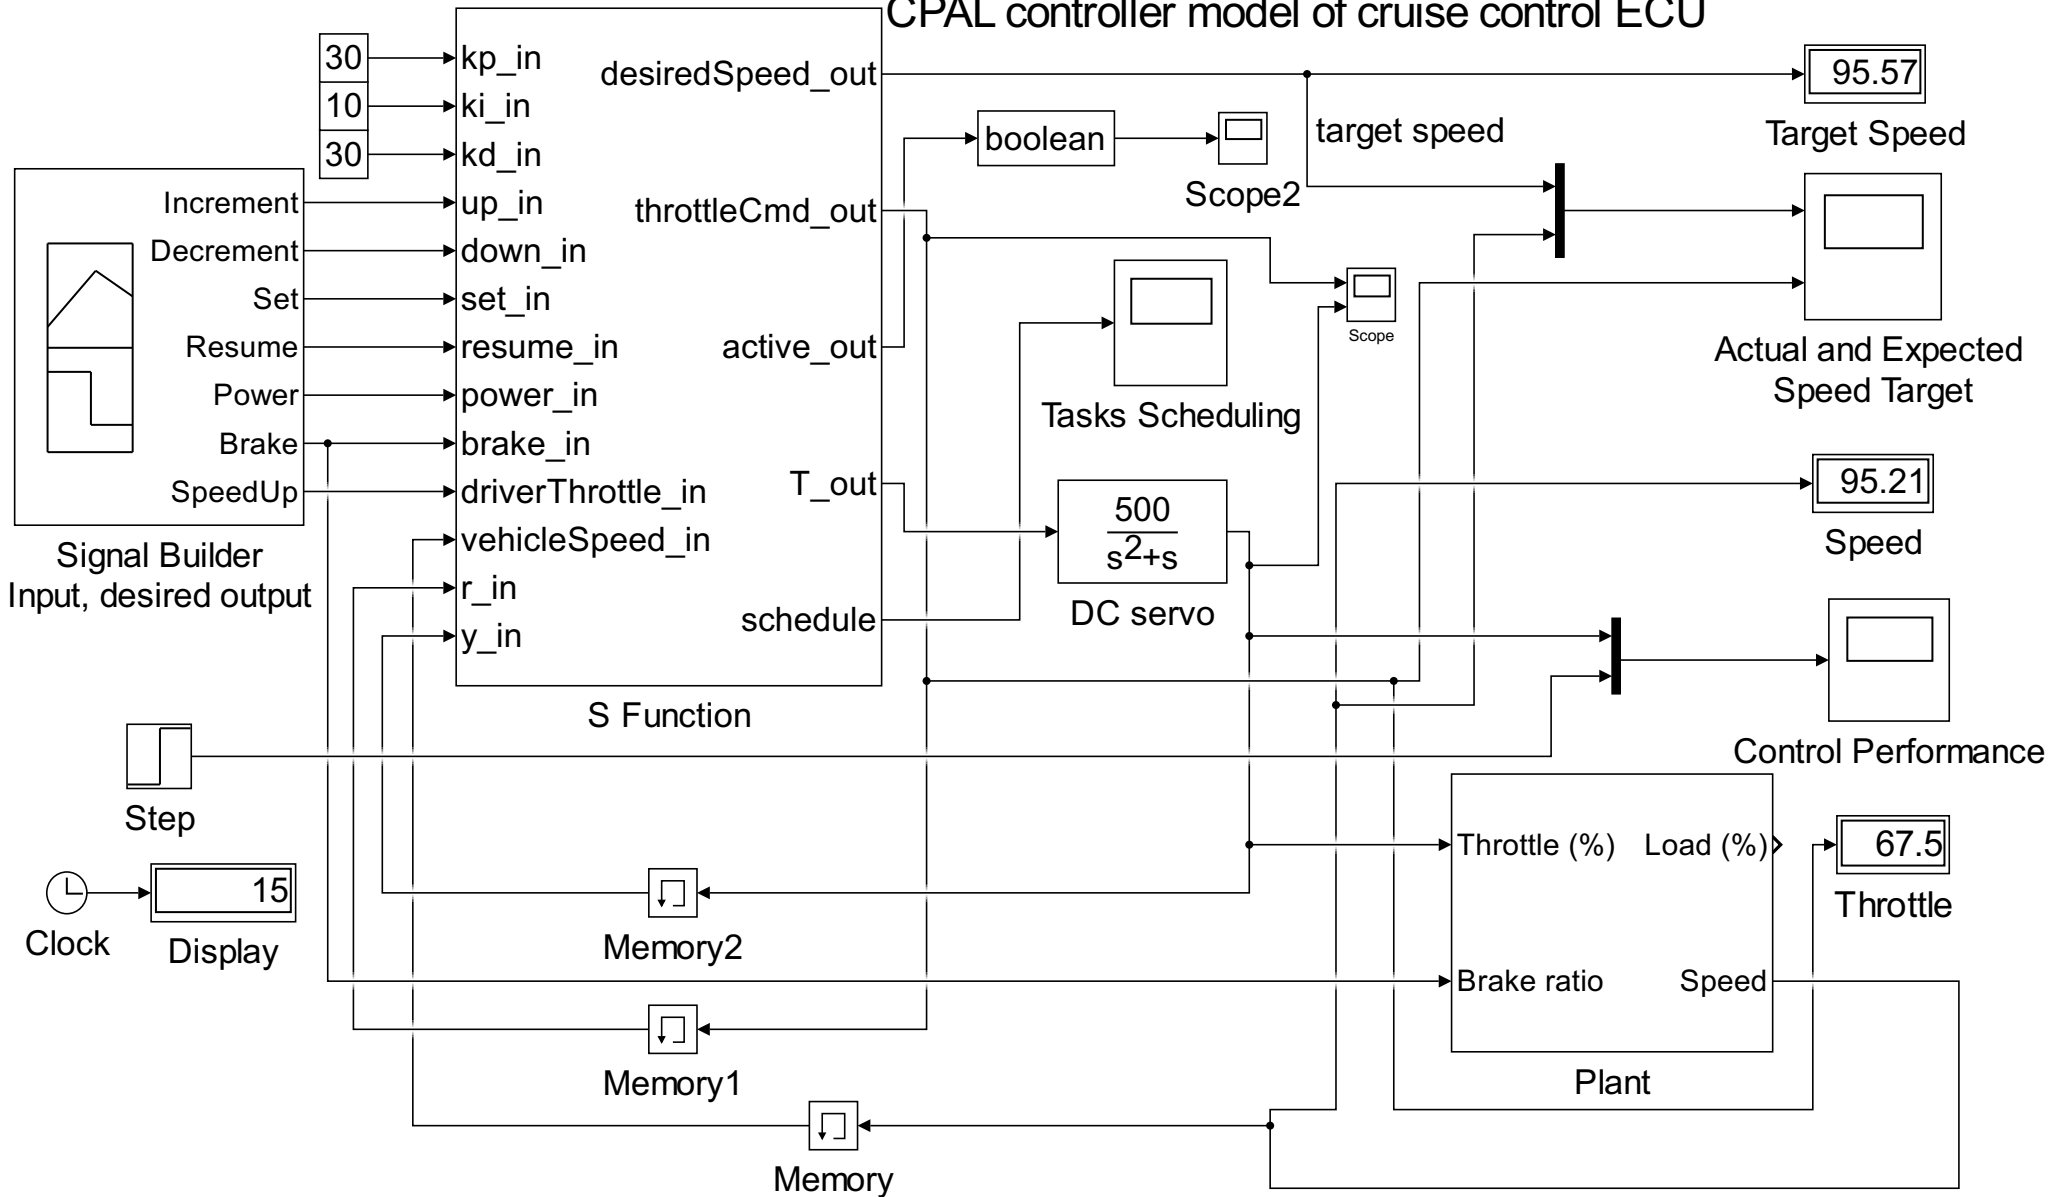

Supplement: s1 [file s1]

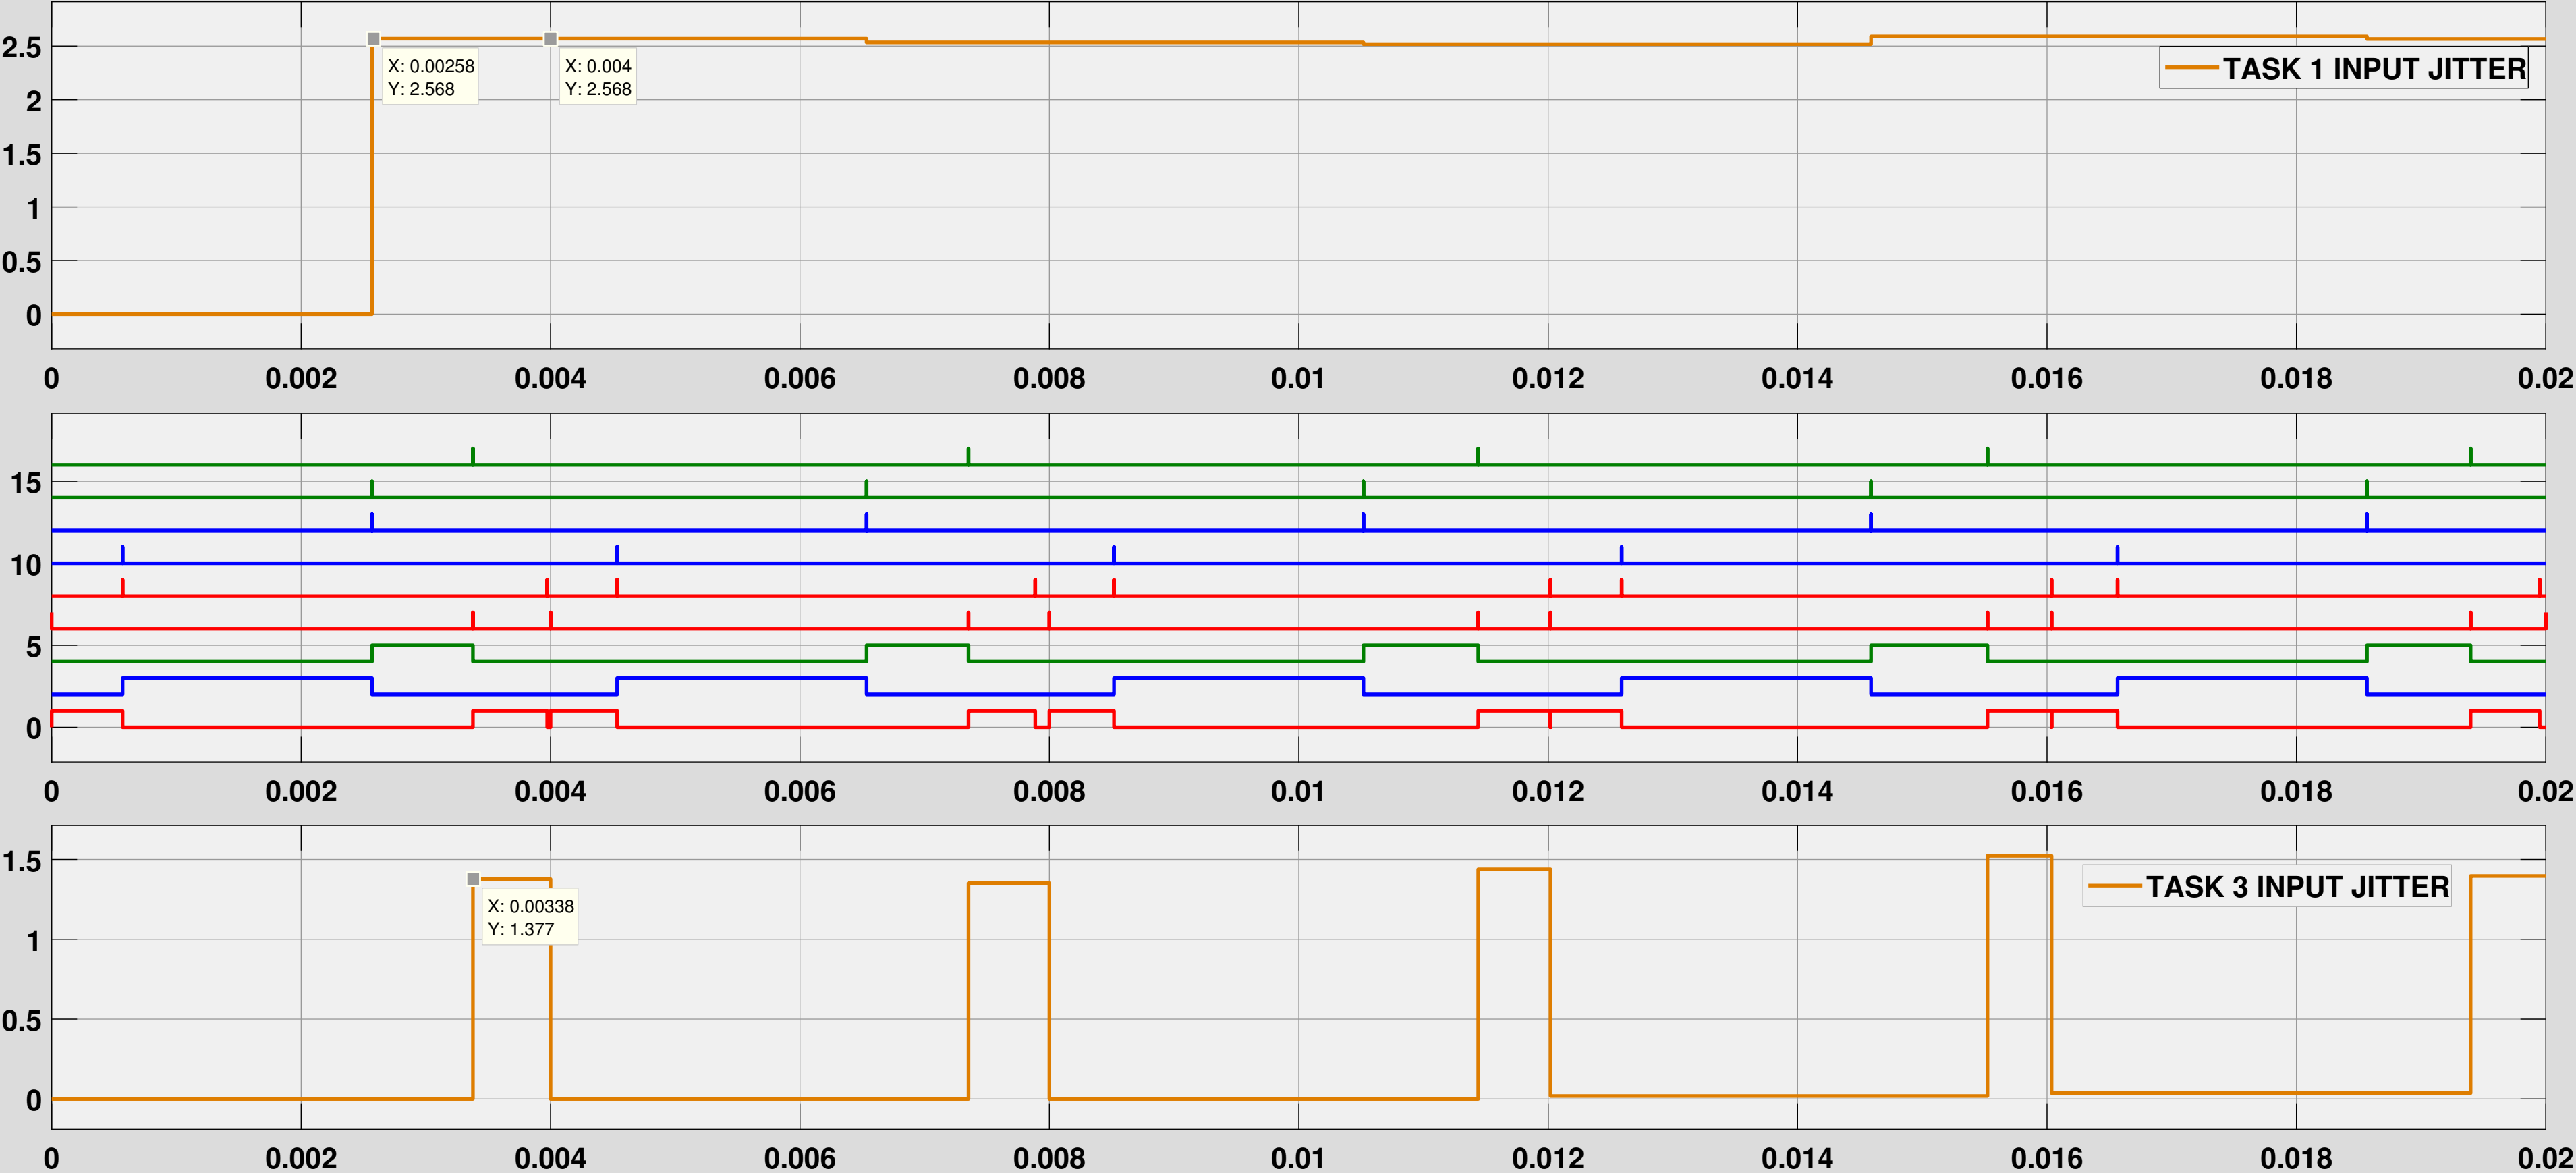

Supplement: s1 [file s1]

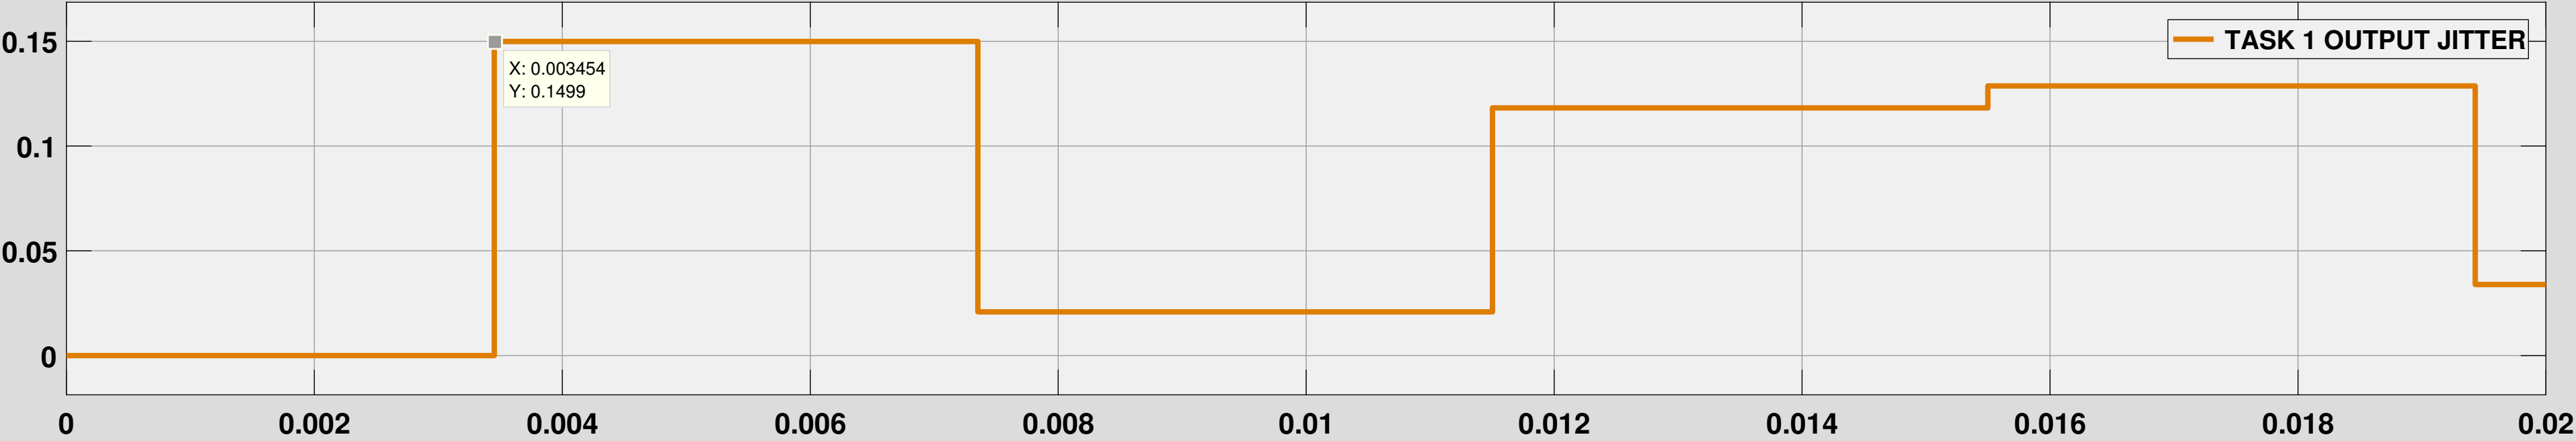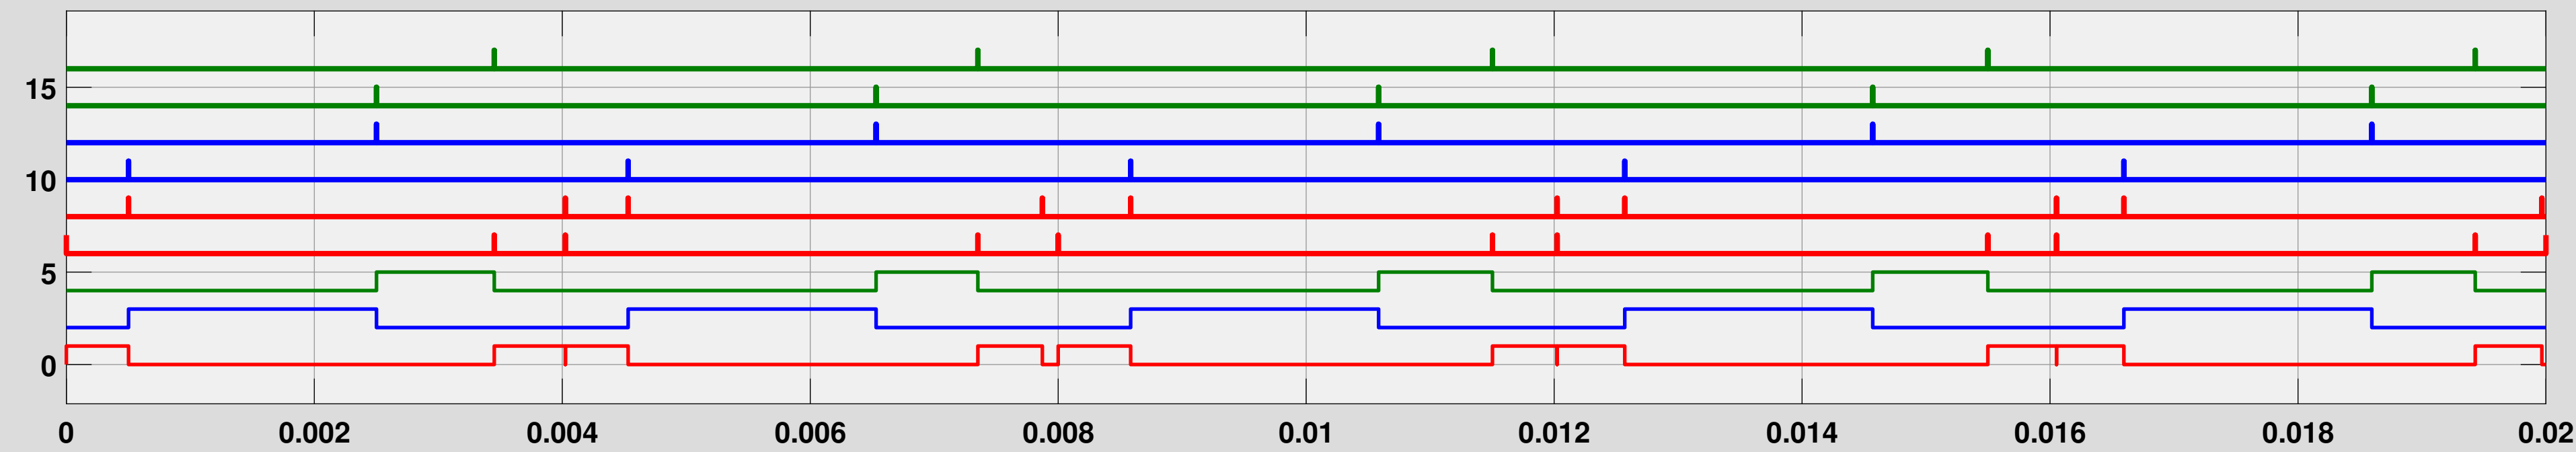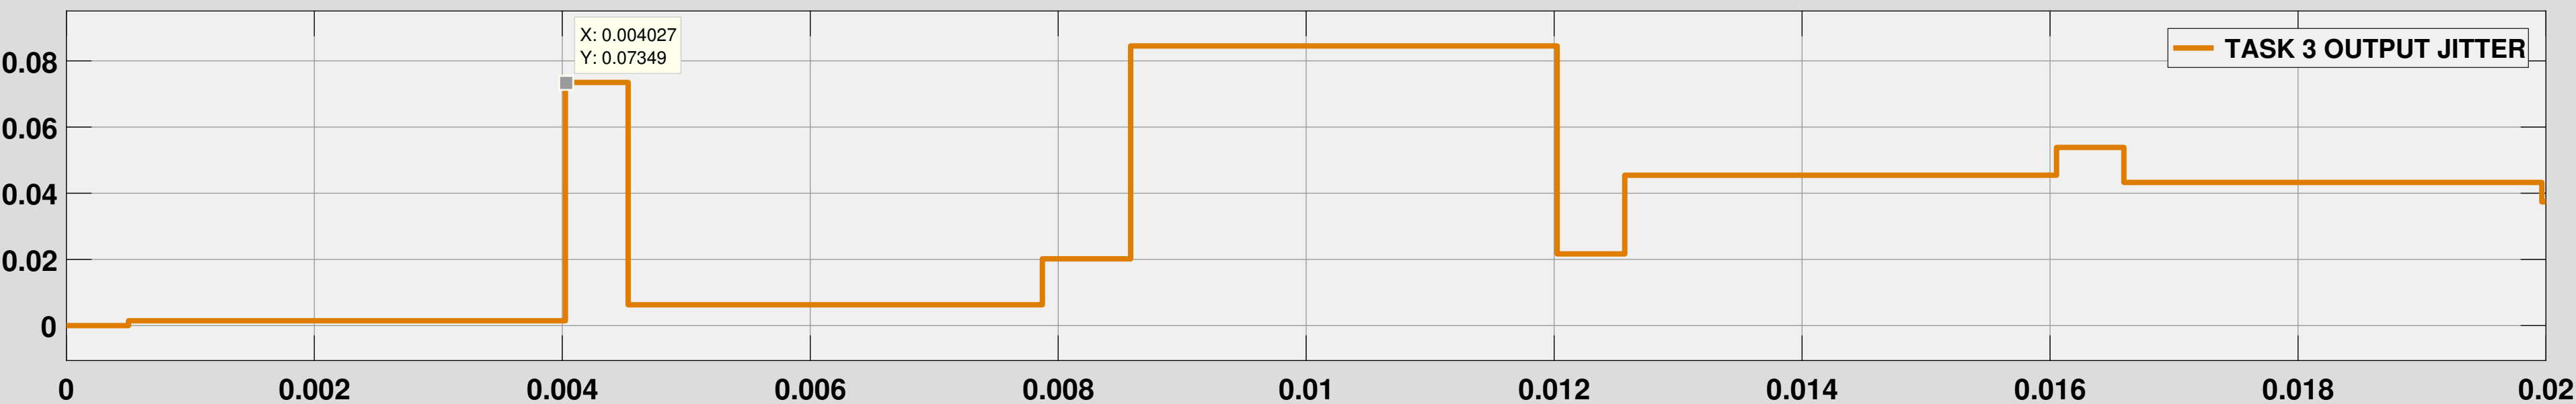

Supplement: s1 [file s1]

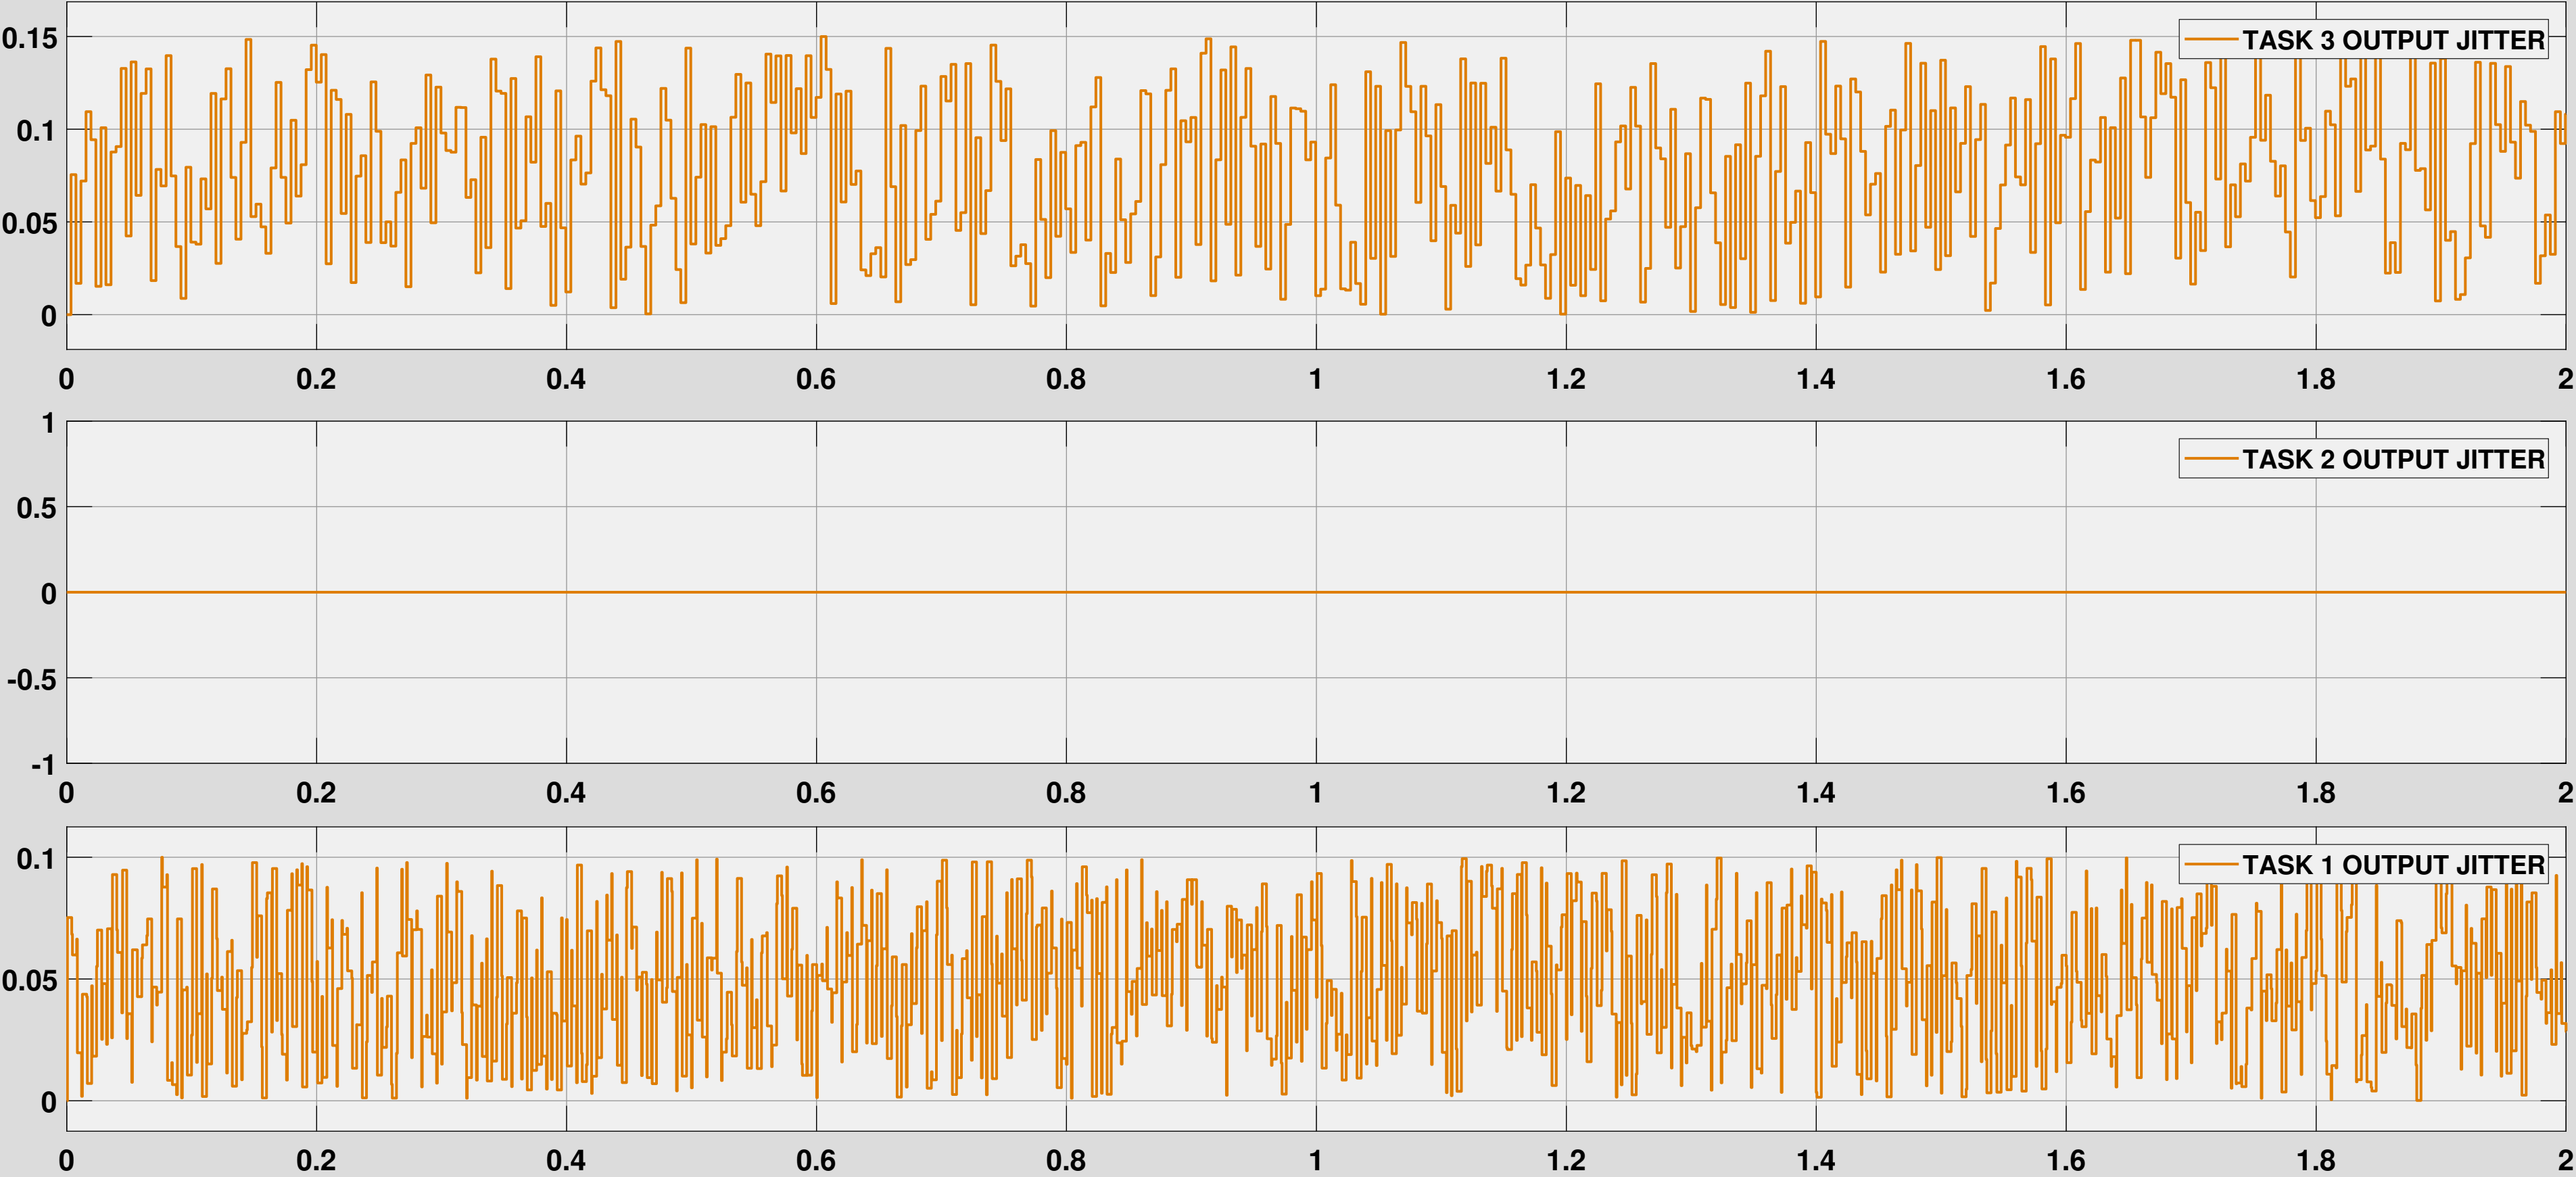

Supplement: s1 [file s1]

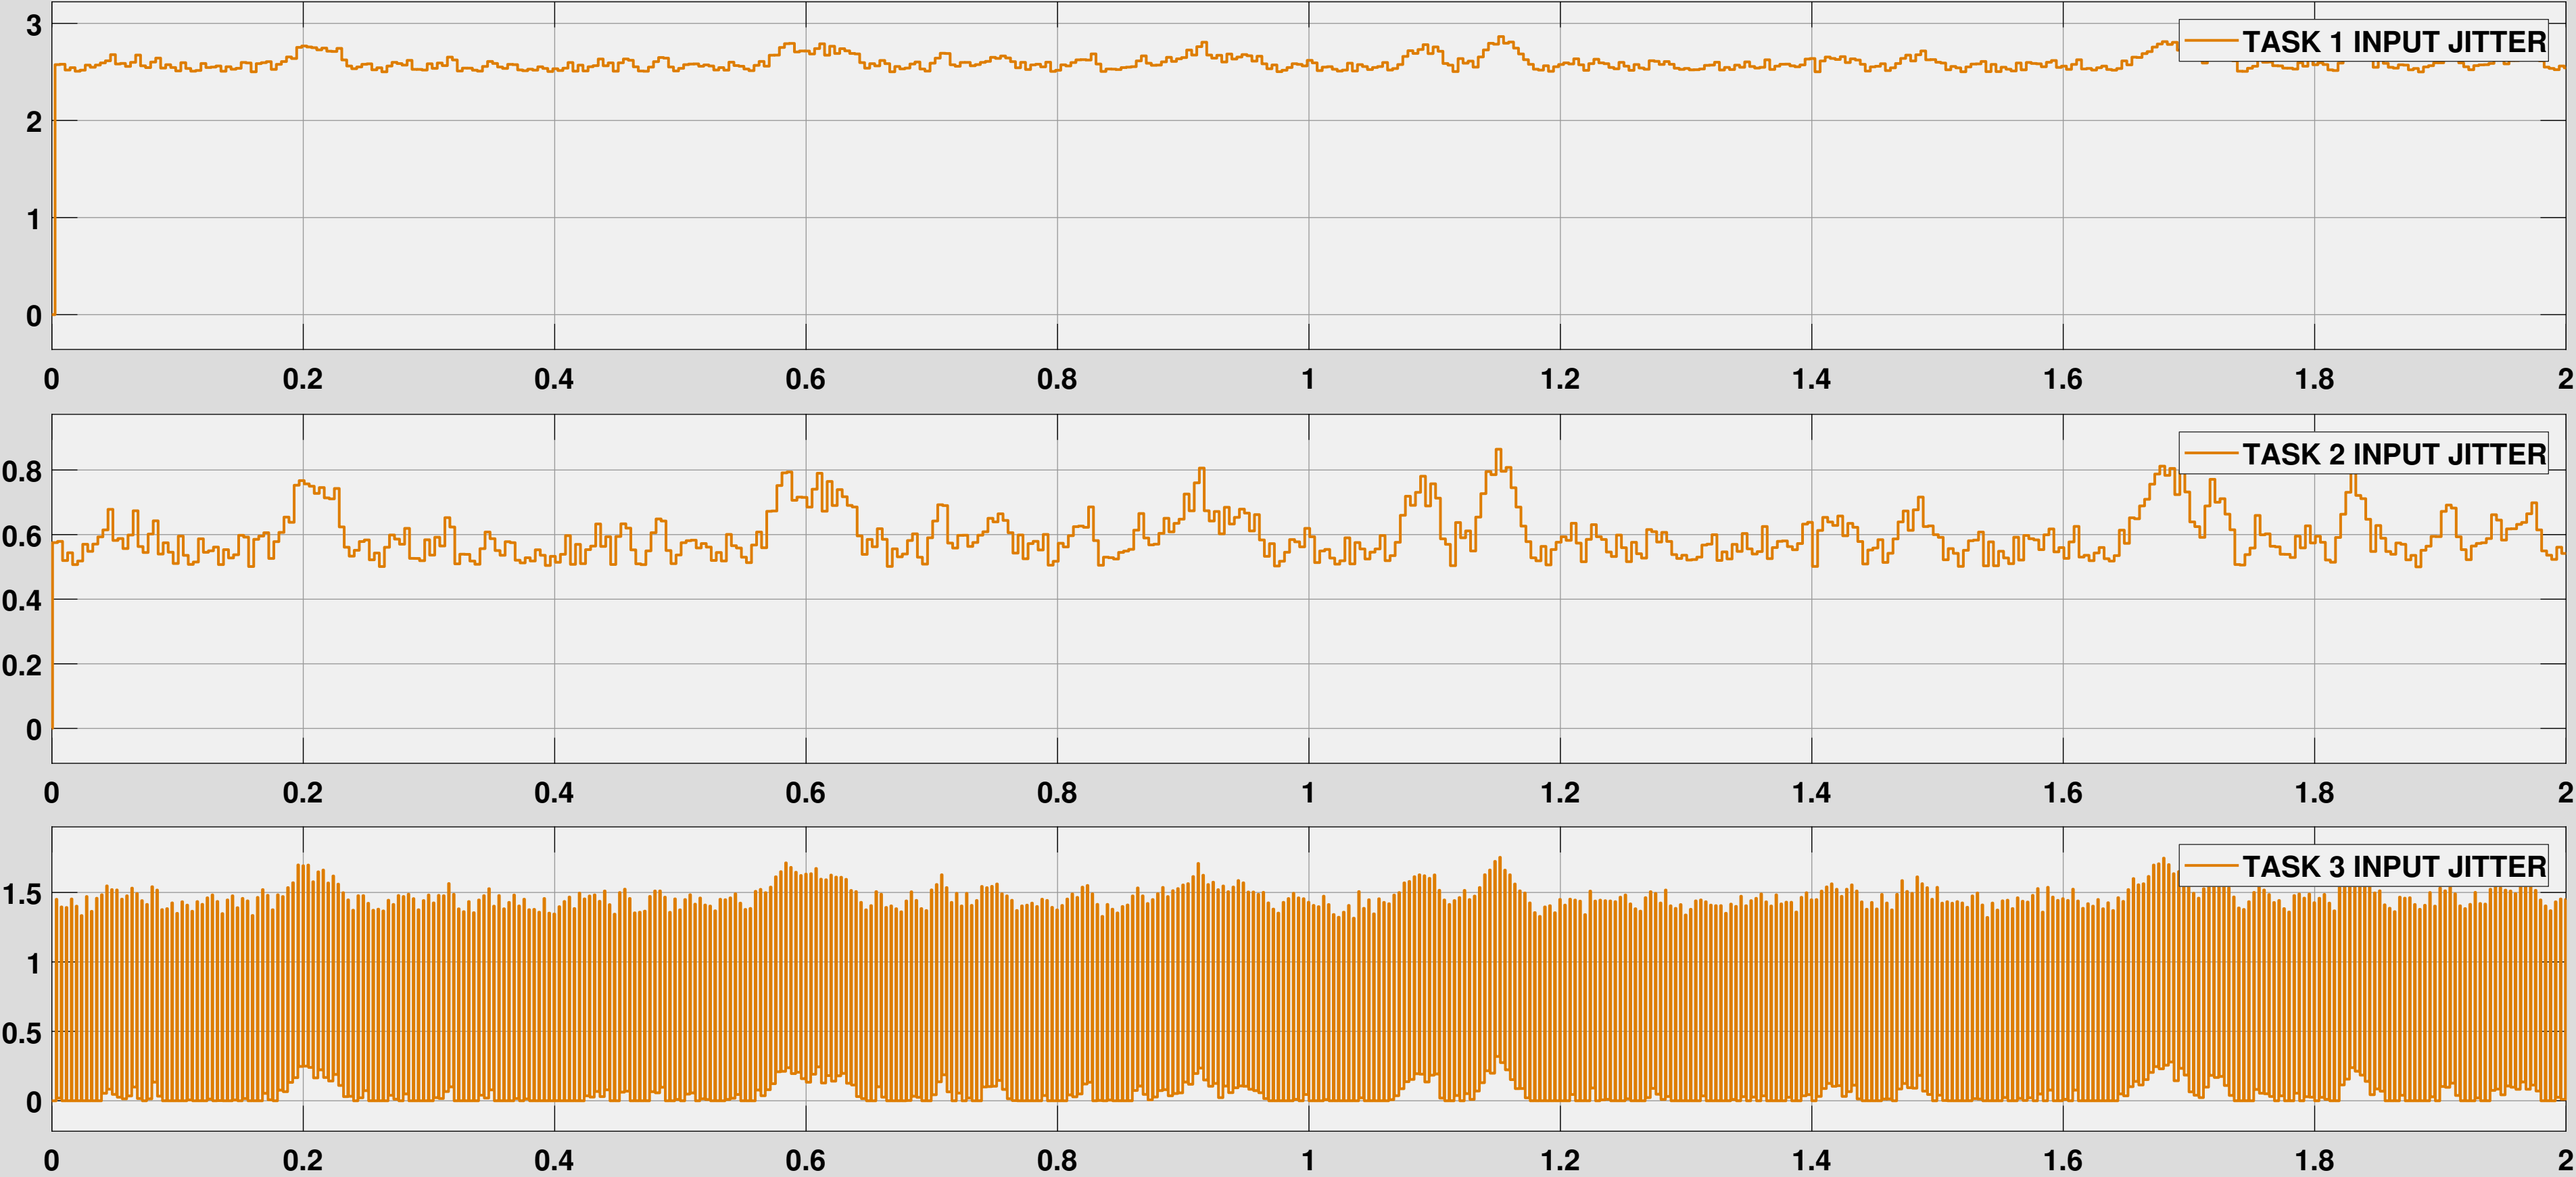

Supplement: s1 [file s1]
